# Supplementary material for: Mo-Doped Cu2S Multilayer Nanosheets Grown In Situ on Copper Foam for Efficient Hydrogen Evolution Reaction
Source: MDPI journal article supplement (doi:10.3390/molecules27185961), 2022-09-13
Supplement: s1 [file s1]

---

*Supplementary Material*

# Mo Doped Cu<sub>2</sub>S Multilayer Nanosheets In Situ Grown on the Copper Foam for Efficient Hydrogen Evolution Reaction

Yajie Xie <sup>1,2</sup>, Jianfeng Huang <sup>1,2,\*</sup>, Rui Xu <sup>2</sup>, Danyang He <sup>2</sup>, Mengfan Niu <sup>2</sup>, Xiaoyi Li <sup>2</sup>, Guoting Xu <sup>2</sup>, Liyun Cao <sup>2</sup> and Liangliang Feng <sup>1,2,\*</sup>

<sup>1</sup> Key Laboratory of Auxiliary Chemistry and Technology for Chemical Industry, Ministry of Education, Shaanxi University of Science and Technology, Xi'an 710021, China

<sup>2</sup> School of Material Science and Engineering, International S&T Cooperation Foundation of Shaanxi Province, Shaanxi University of Science and Technology, Xi'an 710021, China

\* Correspondence: huangjf@sust.edu.cn (J.H.); fengll@sust.edu.cn (L.F.)

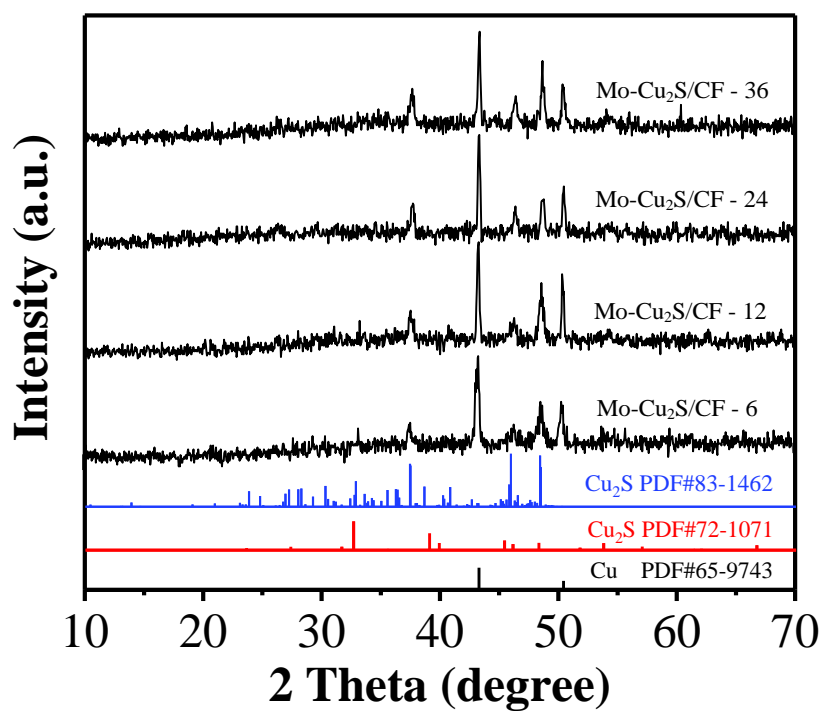

**Figure S1.** XRD of Mo-Cu<sub>2</sub>S/CF-6h; Mo-Cu<sub>2</sub>S/CF-12h; Mo-Cu<sub>2</sub>S/CF-24h; Mo-Cu<sub>2</sub>S/CF-36h.

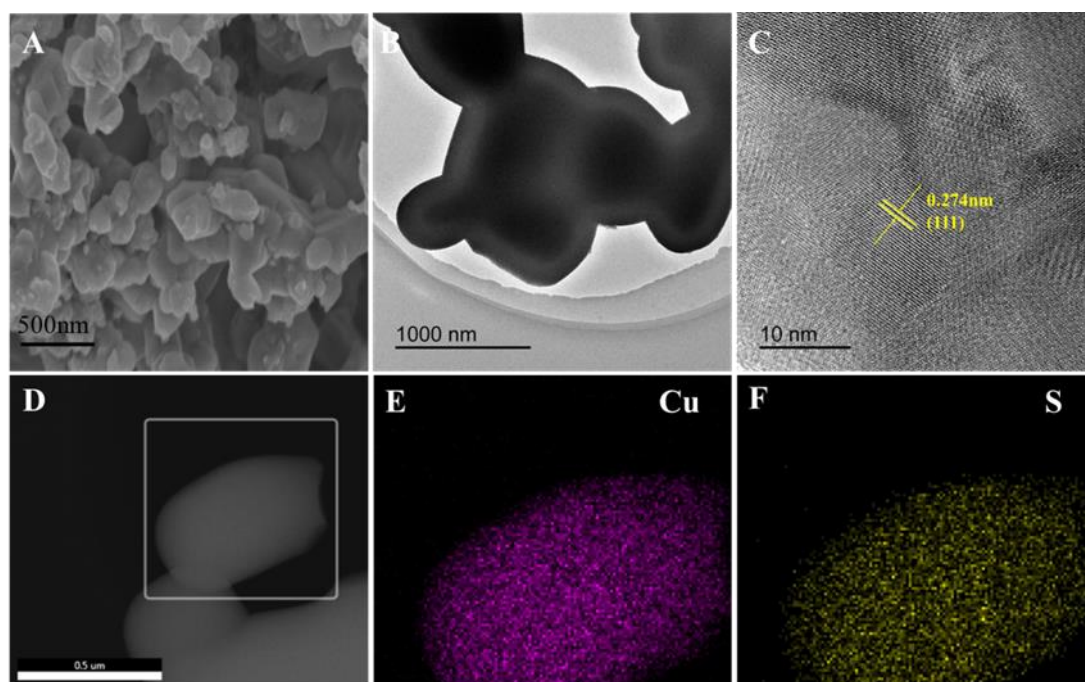

**Figure S2.** (A–C) SEM, TEM and HRTEM images, (D–F) the corresponding elementals mapping images of Cu<sub>2</sub>S/CF.

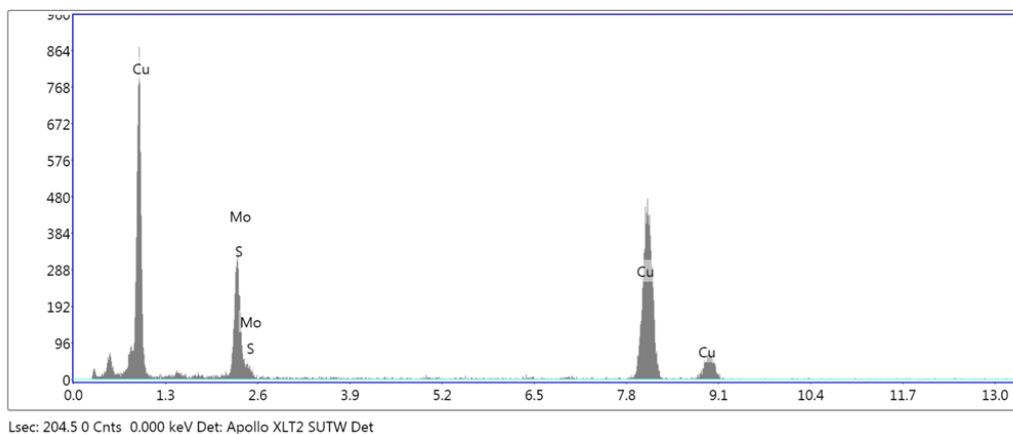

**Figure S3.** STEM-EDX spectrum of the Mo-Cu<sub>2</sub>S/NF.

**Table S1.** The atomic percentage of the Mo-Cu<sub>2</sub>S/NF.

| Element | Weight % | Atomic % | Net Int. | Error % | Kratio | Z    | R    | A    | F    |
|---------|----------|----------|----------|---------|--------|------|------|------|------|
| S K     | 58.78    | 74.23    | 8.5      | 10.04   | 0.21   | 1.03 | 0.96 | 0.35 | 1.00 |
| CuK     | 38.92    | 24.80    | 36.2     | 5.56    | 0.22   | 0.95 | 1.06 | 0.58 | 1.00 |
| MoK     | 2.30     | 0.97     | 1.1      | 21.92   | 0.02   | 0.94 | 1.16 | 0.75 | 1.00 |

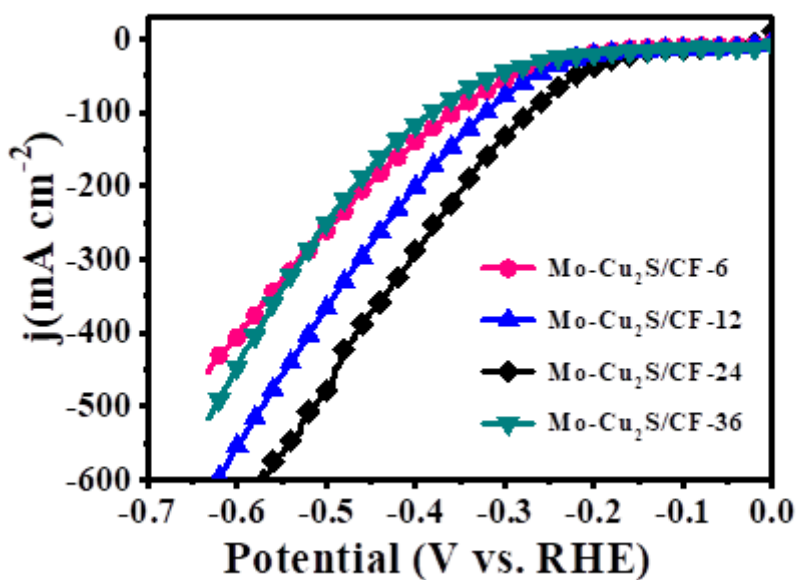

**Figure S4.** Polarization curves of Mo-Cu<sub>2</sub>S/CF-6h; Mo-Cu<sub>2</sub>S/CF-12h; Mo-Cu<sub>2</sub>S/CF-24h; Mo-Cu<sub>2</sub>S/CF-36h.

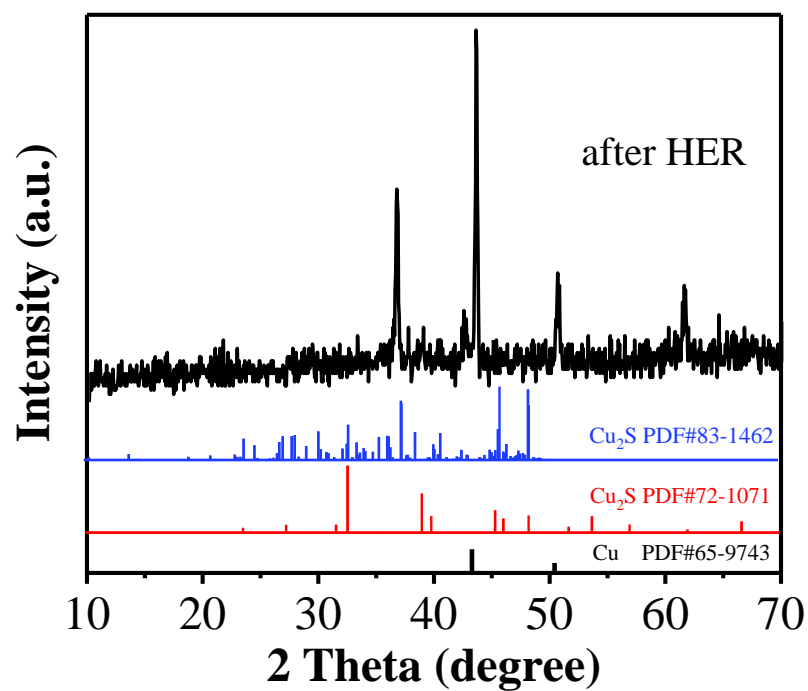

**Figure S5.** XRD of Mo-Cu<sub>2</sub>S/CF after HER test.

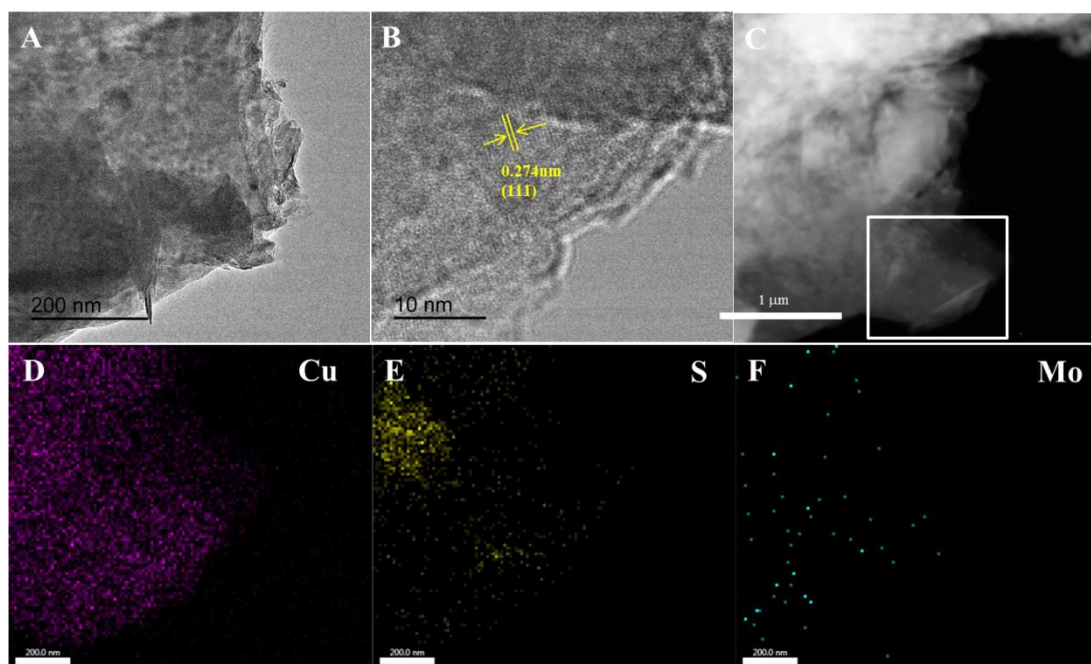

**Figure S6.** (A–B) TEM and HRTEM images, (C) the STEM image, (D–F) the corresponding elemental mapping images of Mo-Cu<sub>2</sub>S/CF after 20 h HER test.

**Table S2.** Comparison of the electrocatalytic activity of Mo-Cu<sub>2</sub>S with previously reported Cu<sub>2</sub>S-based electrocatalysts in 1.0 M KOH electrolyte.

| Catalysts                                            | Electrolyte | Current Density<br>( <i>j</i> , mA/cm <sup>2</sup> ) | Overpotential at<br>Corresponding <i>j</i> (mV) | Reference                                           |
|------------------------------------------------------|-------------|------------------------------------------------------|-------------------------------------------------|-----------------------------------------------------|
| Mo-Cu <sub>2</sub> S/CF                              | 1.0 M KOH   | 10                                                   | 18                                              | This work                                           |
|                                                      | 1.0 M KOH   | 100                                                  | 322                                             |                                                     |
| Cu <sub>2</sub> S films                              | 1.0 M KOH   | 10                                                   | 445                                             | Fuel<br>2022,322,124073 [41]                        |
| V-Cu <sub>2</sub> S-<br>Nanowires NW                 | 1.0 M KOH   | 10                                                   | 188                                             | Scr. Mater.<br>2021, 196, 113756 [27]               |
| Cu <sub>2</sub> S HNAs-CF                            | 1.0 M KOH   | 100                                                  | 125                                             | Sustain. Energy Fuels<br>2021, 5, 2633–2639 [42]    |
| Cu <sub>2</sub> S@Ni <sub>3</sub> Se <sub>2</sub>    | 1.0 M KOH   | 10                                                   | 106                                             | J. Colloid Interface Sci.<br>2021, 592, 13–21 [43]  |
| Cu <sub>2</sub> S-Ni <sub>3</sub> S <sub>2</sub> /NF | 1.0 M KOH   | 10                                                   | 149                                             | Chemistry Select<br>2020, 5, 2455–2464 [44]         |
| Cu <sub>2</sub> S@Cu                                 | 1.0 M KOH   | 10                                                   | 316                                             | Int. J. Hydrogen Energy<br>2019, 44, 1620–1626 [26] |
| Cu <sub>2</sub> S-Co(OH) <sub>2</sub> NTA/CF         | 1.0 M KOH   | 50                                                   | 241                                             | Electrochim. Acta<br>2019, 316, 8–18 [45]           |
| Cu <sub>2</sub> S NRs@CoS/CF)                        | 1.0 M KOH   | 50                                                   | 235                                             | Electrochim. Acta 2018, 296,<br>1035–1041 [46]      |
| Co-Cu <sub>2</sub> S/CF                              | 1.0 M KOH   | 20                                                   | 298                                             | J. Alloys Compd.<br>2018, 762, 637–642 [47]         |
|                                                      | 1.0 M KOH   | 50                                                   | 357                                             |                                                     |
